# Supplementary material for: Advanced piperazine-containing inhibitors target microbial β-glucuronidases linked to gut toxicity
Source: Royal Society of Chemistry journal article supplement (doi:10.1039/d4cb00058g), 2024-01-01
Supplement: d4cb00058g3.pdf [file d4cb00058g3.pdf]

**A**

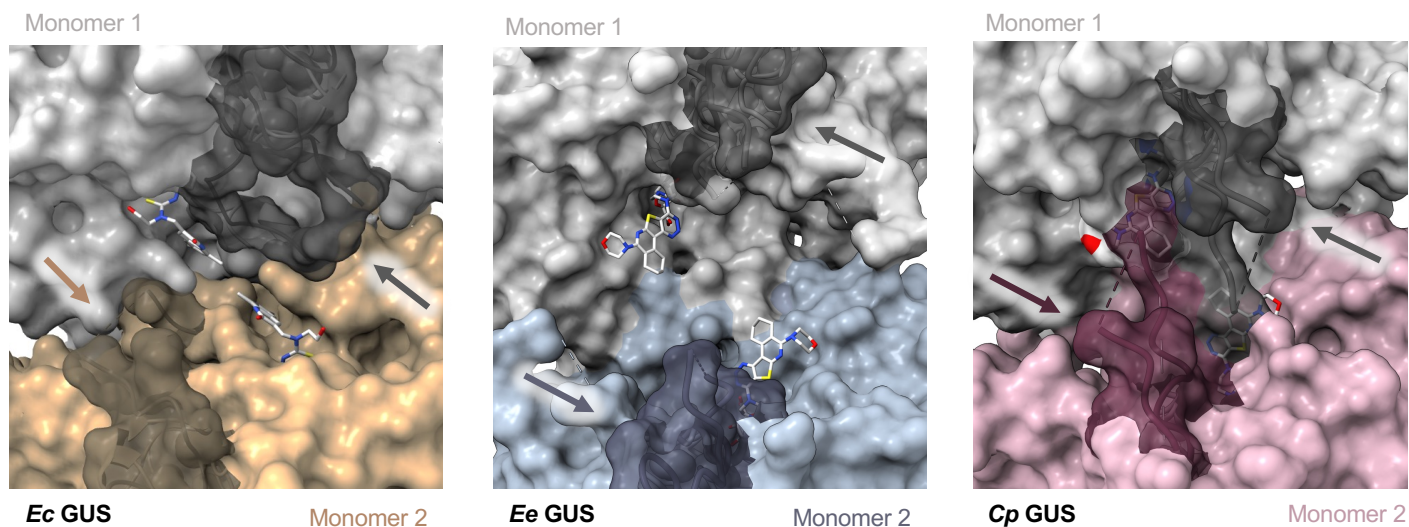

**B**

|           | Loop 1 region                                |     |
|-----------|----------------------------------------------|-----|
| <i>Ec</i> | VIDETAAVGFNLSLIGIGFEAGNPKELYSEEAVNGETQQAHLQA | 391 |
| <i>Sa</i> | VIDEVPVGLFQNFNASLDLSP---KDNGT-WNLMQTKAAHEQA  | 386 |
| <i>Cp</i> | VIDETPAVGLHLNFMAT-GFGGDAP-KRDT-WKEIGTKEAHERI | 390 |
| <i>Ee</i> | VIDETTAVGVNLQFGGGANFGGERIGTFDK-EHGVQTQEHHKDV | 403 |
|           | *** . ***. .: . . *: *                       |     |
