# Supplementary figures and images for: Advanced piperazine-containing inhibitors target microbial β-glucuronidases linked to gut toxicity
Source: Royal Society of Chemistry journal article supplement (doi:10.1039/d4cb00058g), 2024-01-01

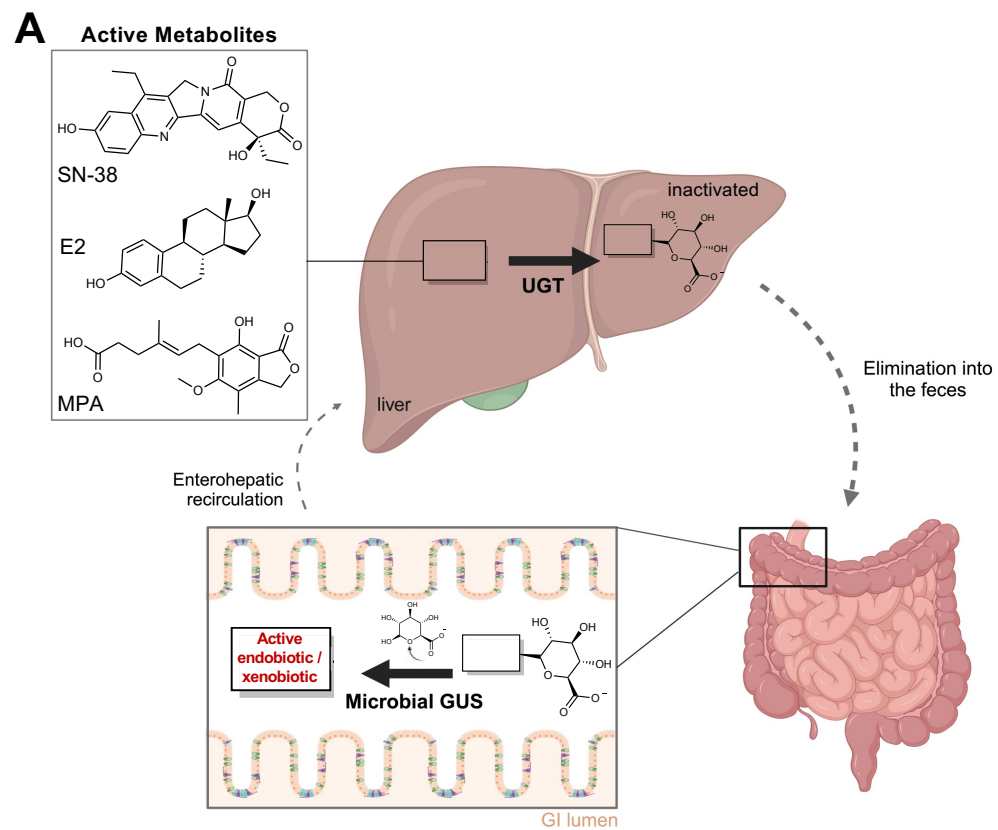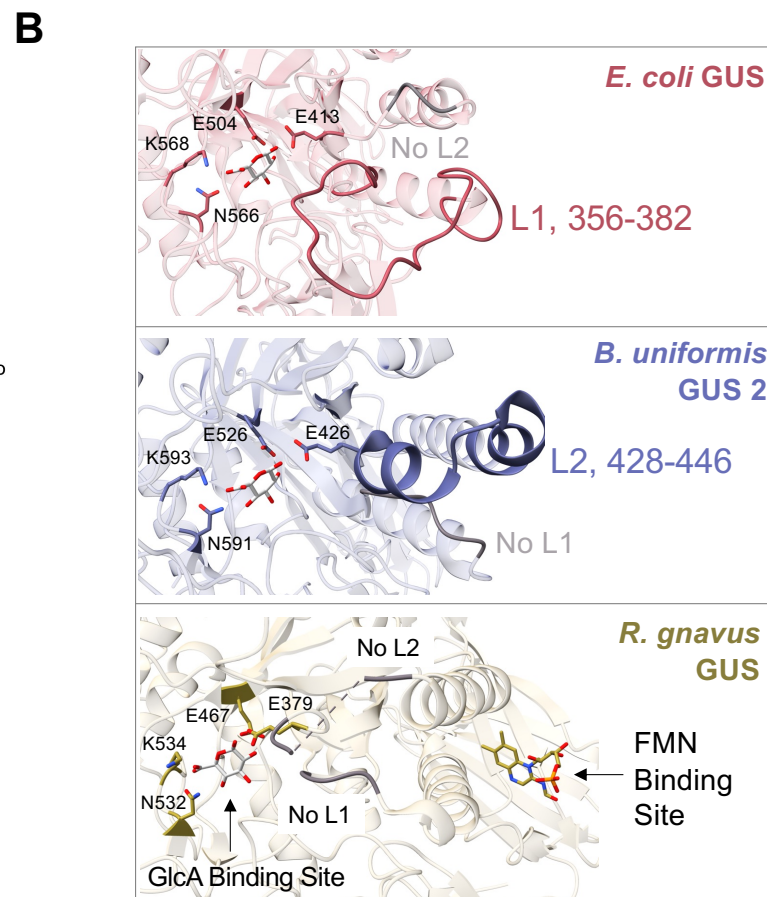

Supplement: d4cb00058g1.pdf [file d4cb00058g1.pdf]

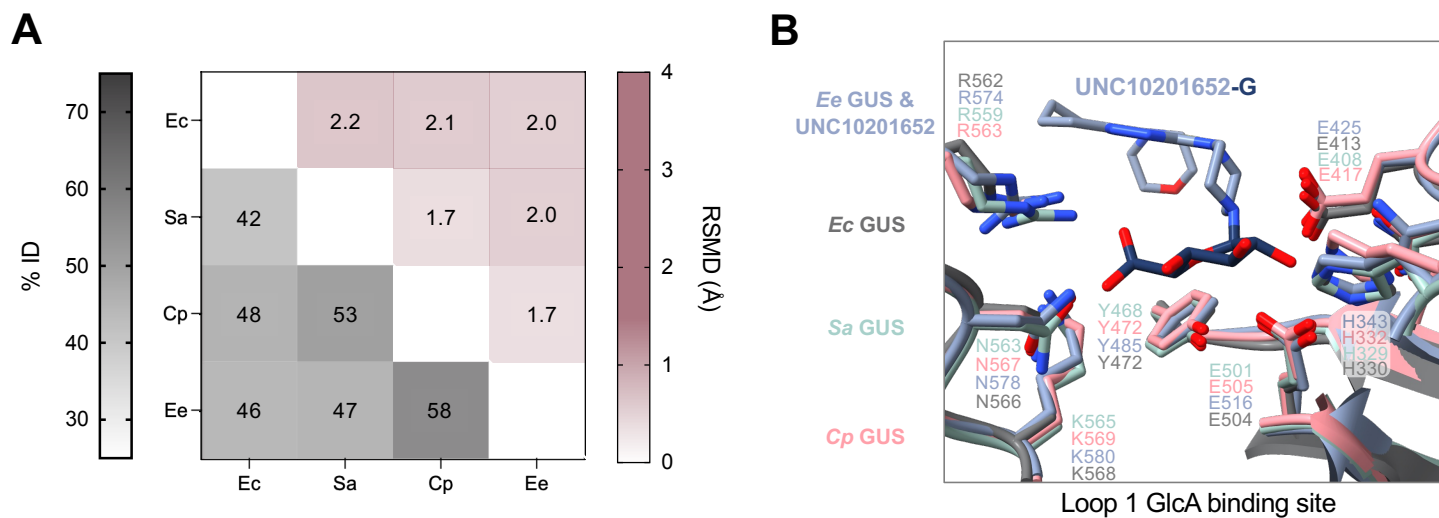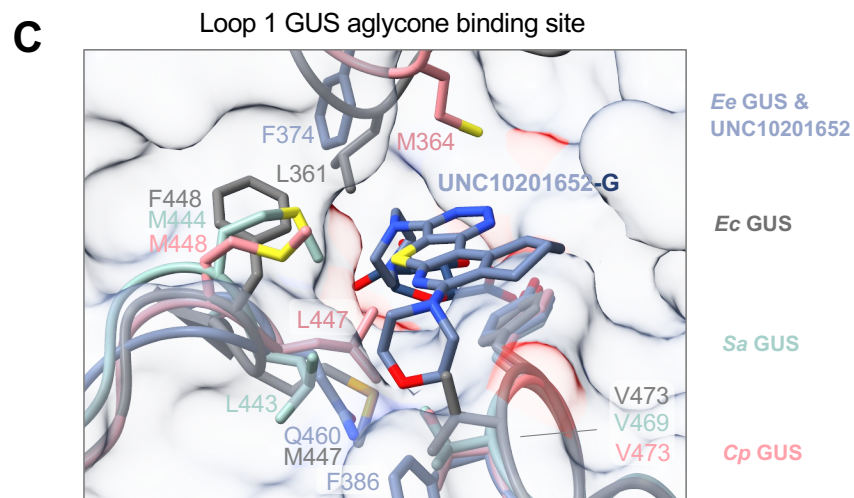

Supplement: d4cb00058g2.pdf [file d4cb00058g2.pdf]

**A**

**Bovine  $\beta$ -glucuronidase**  
[inhibitor] = 10  $\mu$ M

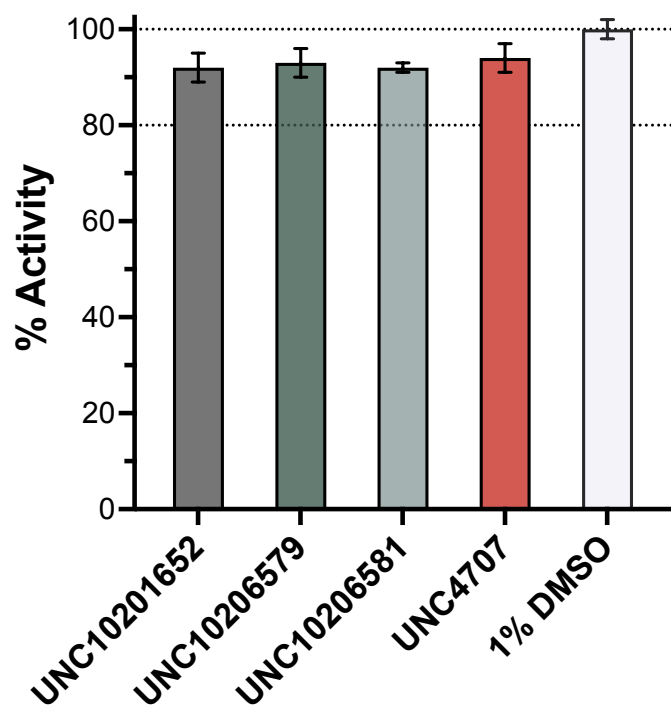

**B**

***E. coli*  $\beta$ -galactosidase**  
[inhibitor] = 10  $\mu$ M

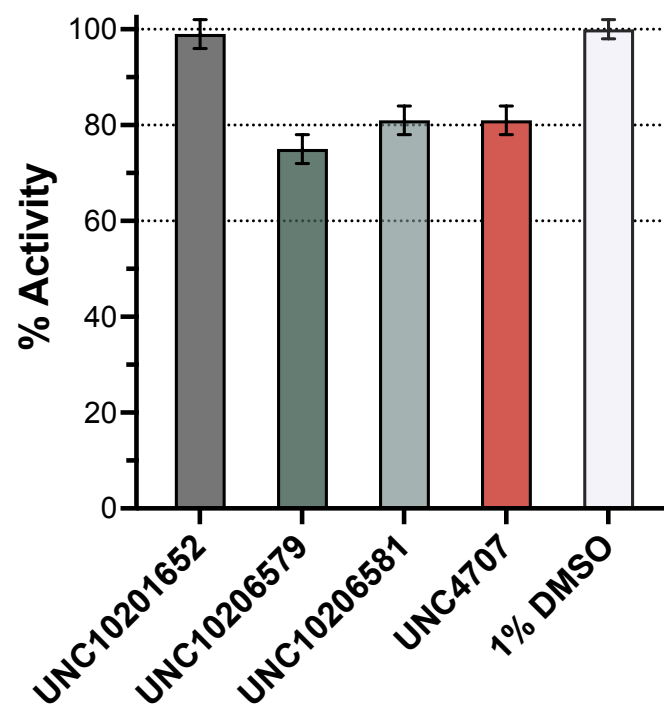

Supplement: d4cb00058g4.pdf [file d4cb00058g4.pdf]

**A**

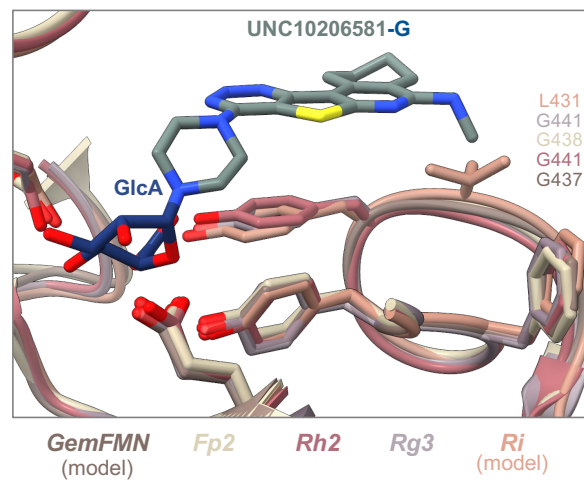

**B**

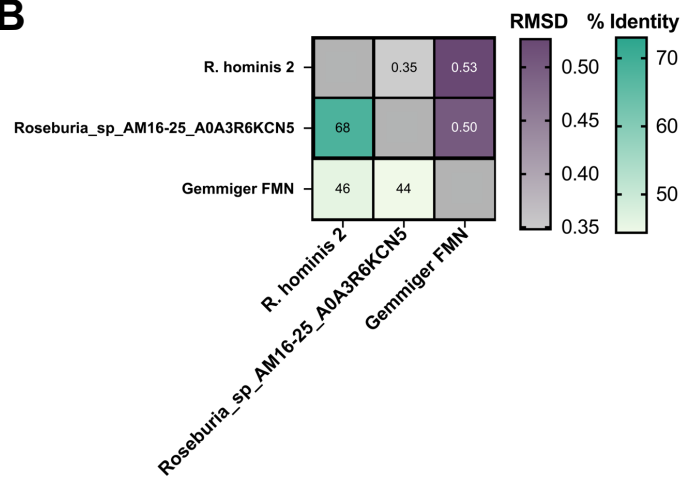

**C**

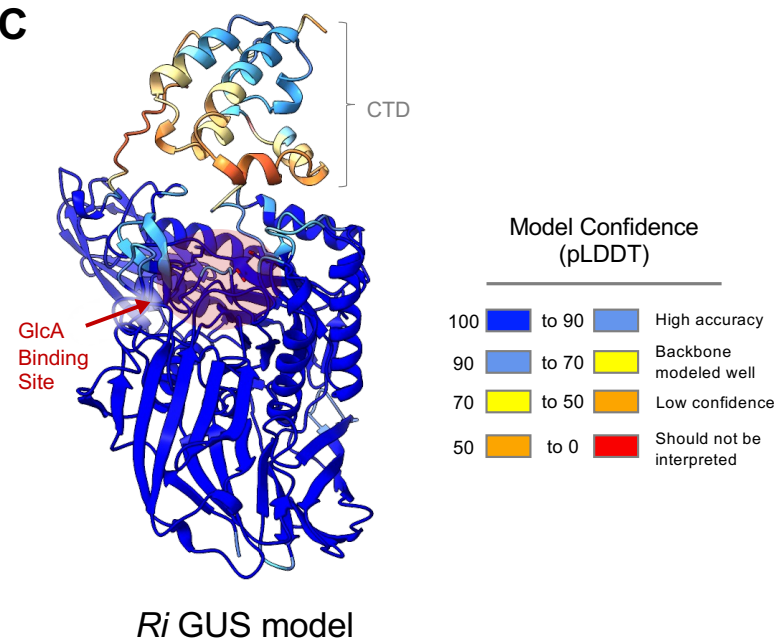

Supplement: d4cb00058g5.pdf [file d4cb00058g5.pdf]
